# Supplementary material for: Novel Strategy for the Recognition of Adulterant Vegetable Oils in Essential Oils Commonly Used in Food Industries by Applying 13C NMR Spectroscopy
Source: PubMed Central journal article supplement (PMC8389833; doi:10.1021/acs.jafc.1c02279), 2021-07-15
Supplement: jf1c02279_si_002.pdf [file jf1c02279_si_002.pdf]

## ZGPG\_PISP\_F2.fas SEQUENCE

```
;zg_pi
;avance-version(07/03/21)
;1D sequence
;a weak 2-5% gradient may also be added after the pi pulse
;$OWNER=nmr
#include<Avance.incl>
#include <Delay.incl>
"d14 = 1.0m"
"acqt0=-p1*2/3.1416"
"d11=30m"
"DELTA=d1-100m"
"p20=1500"
1 ze
d11 pl12:f2
2 30m do:f2
10u pl13:f2
100m cpd2:f2
DELTA
"I9=2*((I1)%2)"
1u iu1
if "I9==0" goto lab3
(p20:sp12 ph1):f1
d14
4u do:f2
lab3, 4u
d11 pl1:f1 pl12:f2
p1 ph2
go=2 ph31 cpd2:f2
30m do:f2 mc #0 to 2 F0(zd)
exit
ph1=0
ph2=0 0 1 1 2 2 3 3
ph31=2 0 3 1 0 2 1 3
;pl1 : f1 channel-power level for pulse (default)
;p1 : f1 channel-high power pulse (90deg)
;pl12: f2 channel - power level for CPD/BB decoupling
;sp1: f1 channel - shaped pulse (180degree inversion)
;spsnam2: Crp60,0.5,20.1
;d1 : relaxation delay; 1-5*T1
;d11: delay for disk I/O (30ms)
;d14 : pi delay
;NS : 1*n, total number of scans: NS*TD0
;cpd2: decoupling according to sequence defined by cpdprg2
;pcpd2: f2 channel - 90 degree pulse for decoupling sequence
;plw13=0 for quantitative purpose without NOE
```

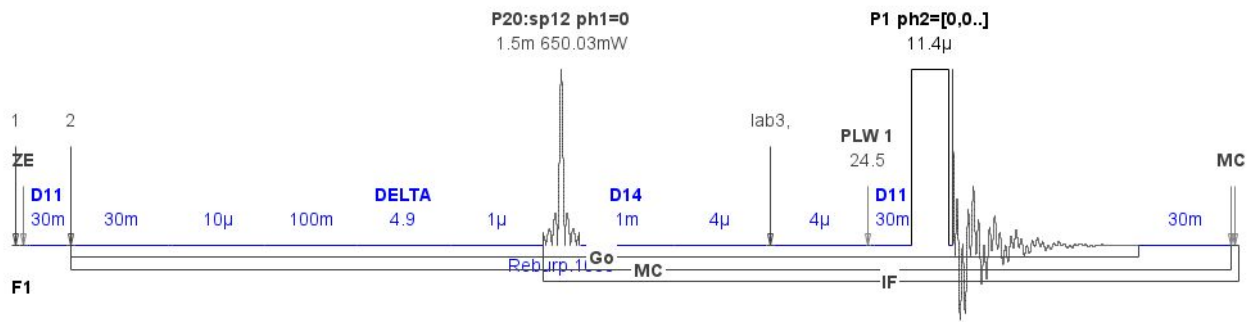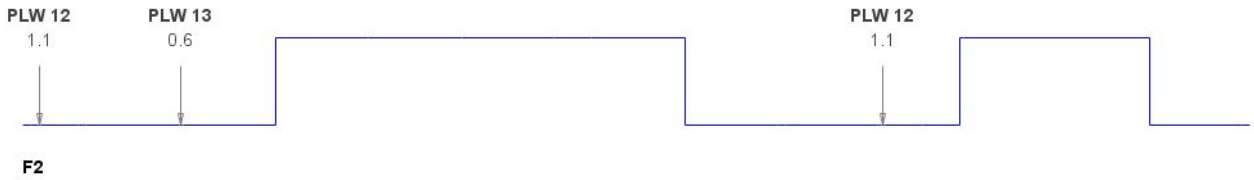

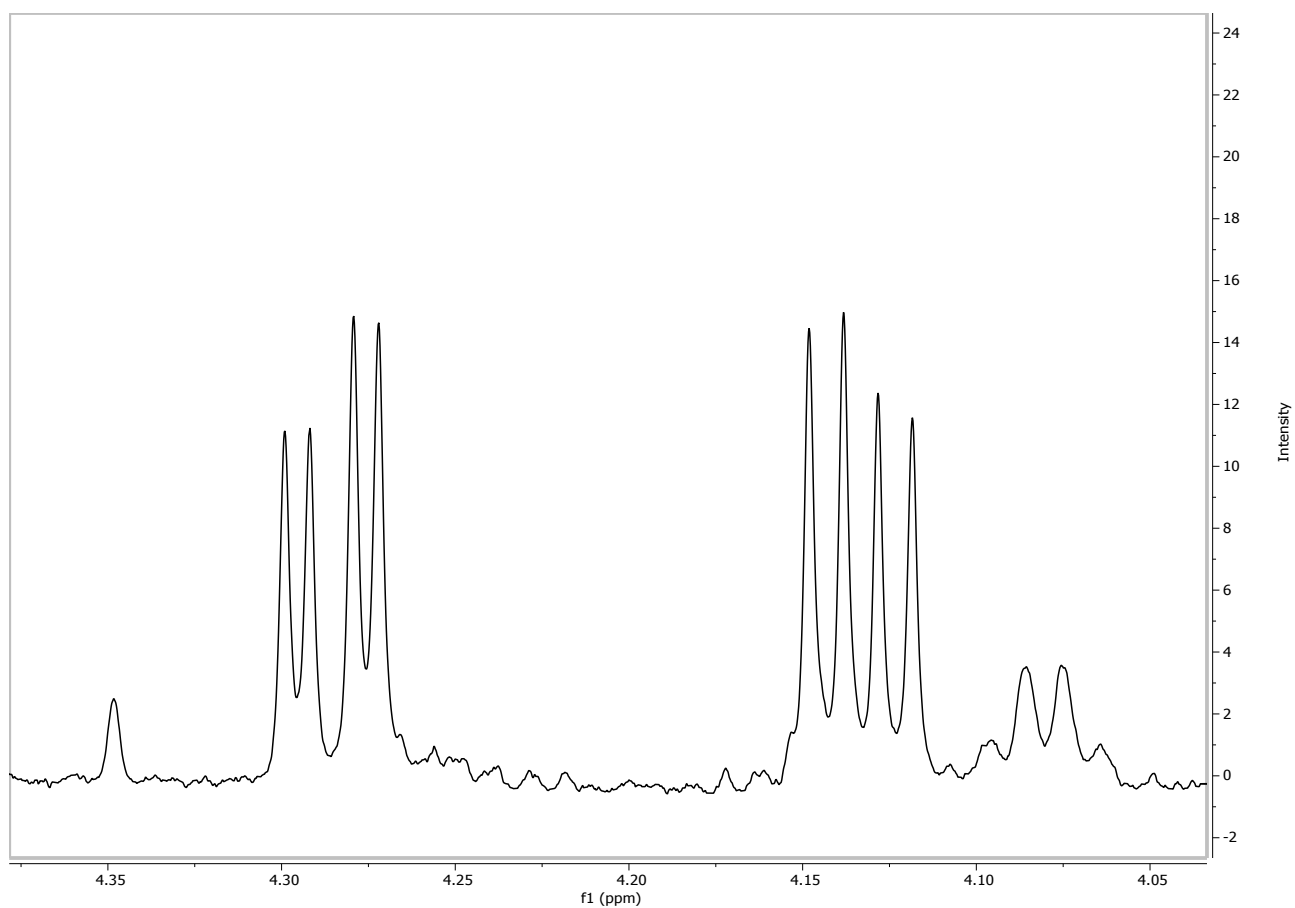

**Figure S1.**  $^1\text{H}$ -NMR spectrum enlargement on glycerol backbone signals of a binary mixture composed by rosemary EO and peanut at the concentration of 0.8% w/w.

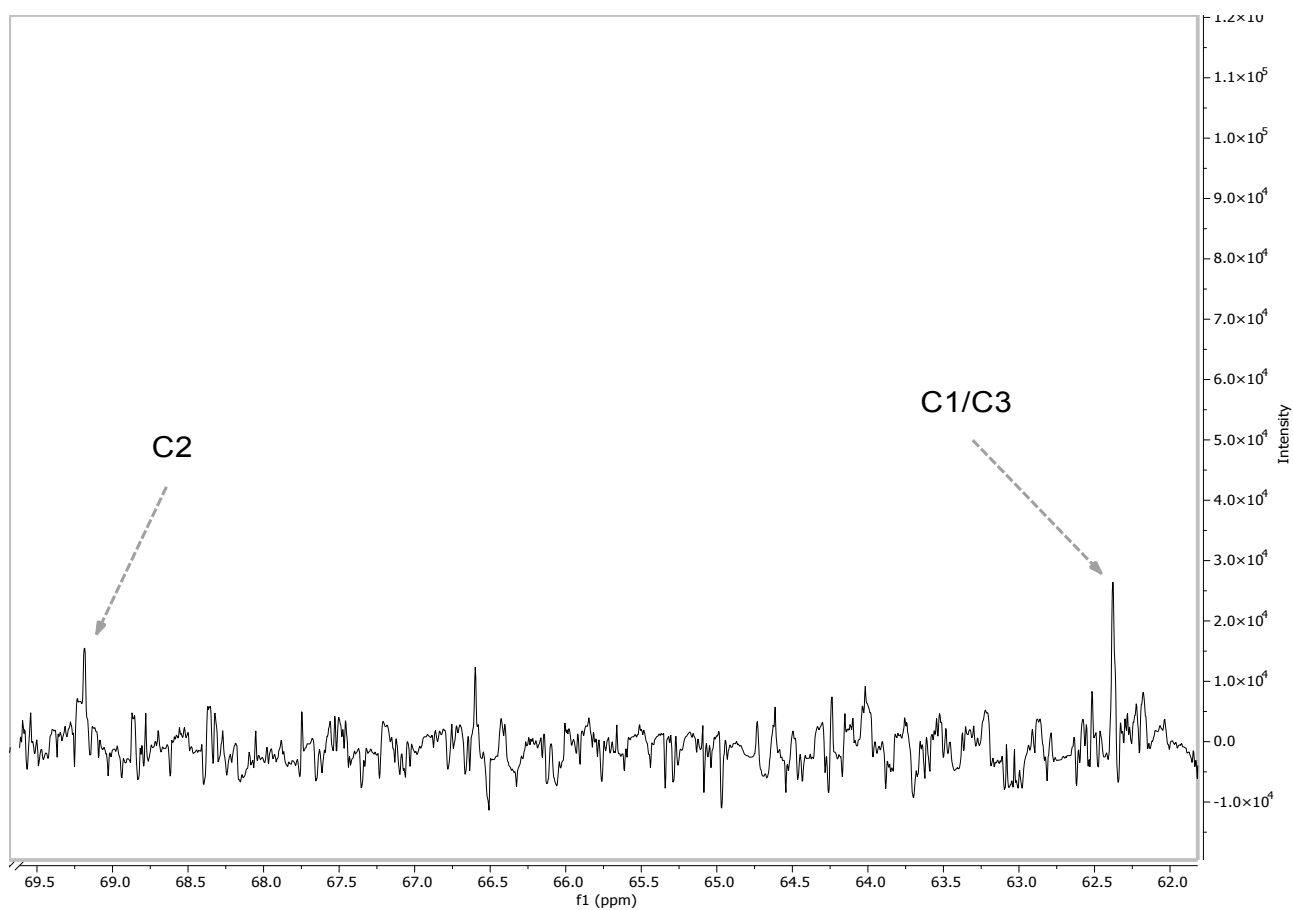

**Figure S2.**  $^{13}\text{C}$ -NMR spectrum enlargement on glycerol backbone signals of a binary mixture composed by rosemary EO and peanut at the concentration of 0.8% w/w.
